# Supplementary material for: Correlation of Somatic Mutation and Expression Identifies Genes Important in Human Glioblastoma Progression and Survival
Source: Oxford University Press journal article supplement (doi:10.1158/0008-5472.can-11-0180), 2011-05-10
Supplement: 00085472can110180-sup-sdata_3.xls [file 00085472can110180-sup-sdata_3.xls]

## Sheet: AKR1C3
AKR1C3	UpRegCo-Occ	KLHL7	0.003869
AKR1C3	UpRegCo-Occ	RCL1	0.009027
AKR1C3	UpRegCo-Occ	HMGN2	0.001207
AKR1C3	UpRegCo-Occ	CDK4	0.002484
AKR1C3	UpRegCo-Occ	HOXD13	0.009027

## Sheet: ANK1
ANK1	UpRegCo-Occ	OTOR	0.000813
ANK1	UpRegCo-Occ	C6ORF124	0.002684

## Sheet: ATM
ATM	UpRegCo-Occ	MTMR2	0.000544
ATM	UpRegCo-Occ	ZNF492	0.001905
ATM	UpRegCo-Occ	RANBP17	0.003265
ATM	UpRegCo-Occ	SUSD5	0.005986
ATM	UpRegCo-Occ	GTPBP4	0.001905
ATM	UpRegCo-Occ	TFDP2	0.001905
ATM	UpRegCo-Occ	SUV39H2	0.00136
ATM	UpRegCo-Occ	SNRPF	0.000907
ATM	UpRegCo-Occ	PRR3	0.00136
ATM	UpRegCo-Occ	PLK4	0.003265
ATM	UpRegCo-Occ	AOF2	0.000907
ATM	UpRegCo-Occ	DDX52	0.000907
ATM	UpRegCo-Occ	TEX10	0.001905
ATM	UpRegCo-Occ	TPP2	0.00136
ATM	UpRegCo-Occ	TAF5L	0.000907
ATM	UpRegCo-Occ	C1ORF77	0.000907
ATM	UpRegCo-Occ	JMJD1C	0.001905
ATM	UpRegCo-Occ	KLRC4	0.003265
ATM	UpRegCo-Occ	MCM10	0.001905
ATM	UpRegCo-Occ	FAM77C	0.001905
ATM	UpRegCo-Occ	AAAS	0.000907
ATM	UpRegCo-Occ	BCS1L	0.000544
ATM	UpRegCo-Occ	ZNF208	0.001905
ATM	UpRegCo-Occ	ZSCAN16	0.001905
ATM	UpRegCo-Occ	KLRC3	0.00136
ATM	UpRegCo-Occ	C10ORF68	0.004988
ATM	UpRegCo-Occ	CBLN1	0.004081
ATM	UpRegCo-Occ	EXOSC2	0.00136
ATM	UpRegCo-Occ	IKBKAP	0.000907
ATM	UpRegCo-Occ	GAS1	0.001905
ATM	UpRegCo-Occ	UBE2I	0.000907
ATM	UpRegCo-Occ	PDCD11	0.00136
ATM	UpRegCo-Occ	BRD9	0.00136
ATM	UpRegCo-Occ	PDE10A	0.002539
ATM	UpRegCo-Occ	DLL3	0.000907
ATM	UpRegCo-Occ	THOC5	0.000907
ATM	UpRegCo-Occ	DET1	0.001905
ATM	UpRegCo-Occ	ZNF22	0.001905
ATM	UpRegCo-Occ	ALDH8A1	0.002539
ATM	UpRegCo-Occ	SETDB1	0.002539
ATM	UpRegCo-Occ	ZNF250	0.000544
ATM	UpRegCo-Occ	KIFC1	0.001905
ATM	UpRegCo-Occ	SFPQ	0.000544
ATM	UpRegCo-Occ	ZNF493	0.000907
ATM	UpRegCo-Occ	ZNF510	0.00136
ATM	UpRegCo-Occ	CCT3	0.000907
ATM	UpRegCo-Occ	NCAPH	0.002539
ATM	UpRegCo-Occ	DCLRE1C	0.00136
ATM	UpRegCo-Occ	BRCA2	0.000907
ATM	UpRegCo-Occ	C11ORF30	0.000907
ATM	UpRegCo-Occ	CSTF2T	0.002539
ATM	UpRegCo-Occ	PAPD1	0.002539
ATM	UpRegCo-Occ	TFAM	0.001905
ATM	UpRegCo-Occ	LIG3	0.000544
ATM	UpRegCo-Occ	ZEB1	0.00136
ATM	UpRegCo-Occ	C10ORF137	0.002539
ATM	UpRegCo-Occ	ATF7IP	0.000907
ATM	UpRegCo-Occ	TP53	9.1e-05
ATM	UpRegCo-Occ	BUB1B	0.000544
ATM	UpRegCo-Occ	TRIM27	0.000272
ATM	UpRegCo-Occ	ACVR2A	0.00136
ATM	UpRegCo-Occ	LOC90379	0.00136
ATM	UpRegCo-Occ	KIF22	0.001905
ATM	UpRegCo-Occ	USP3	0.00136
ATM	UpRegCo-Occ	SAFB	0.001905
ATM	UpRegCo-Occ	C17ORF85	0.00136
ATM	UpRegCo-Occ	ZNF239	0.002539
ATM	UpRegCo-Occ	CCT5	0.000544
ATM	UpRegCo-Occ	KIAA0922	0.00136
ATM	UpRegCo-Occ	POLR2F	0.000907
ATM	UpRegCo-Occ	DHX8	0.000907
ATM	UpRegCo-Occ	TGS1	0.000907
ATM	UpRegCo-Occ	SACS	0.00136
ATM	UpRegCo-Occ	EDC3	0.000544
ATM	UpRegCo-Occ	ANKRD10	0.000544
ATM	UpRegCo-Occ	CCNJ	0.00136
ATM	UpRegCo-Occ	MAP3K4	0.000272
ATM	UpRegCo-Occ	SECISBP2	0.00136
ATM	UpRegCo-Occ	TMPO	0.001905
ATM	UpRegCo-Occ	PARG	0.003265
ATM	UpRegCo-Occ	ERCC3	0.00136
ATM	UpRegCo-Occ	CDC5L	0.00136
ATM	UpRegCo-Occ	LRP5	0.000907
ATM	UpRegCo-Occ	GNPAT	0.000544
ATM	UpRegCo-Occ	CENPC1	0.00136
ATM	UpRegCo-Occ	MCPH1	0.000544
ATM	UpRegCo-Occ	UBXD6	0.000544
ATM	UpRegCo-Occ	C10ORF18	0.003265
ATM	UpRegCo-Occ	THRAP3	0.000907
ATM	UpRegCo-Occ	TMEM39B	0.001905
ATM	UpRegCo-Occ	DDX31	0.000907
ATM	DownRegCo-Occ	SLC25A20	0.004081
ATM	DownRegCo-Occ	SWAP70	0.003265
ATM	DownRegCo-Occ	ACADS	0.002539
ATM	DownRegCo-Occ	PHKA2	0.00136
ATM	DownRegCo-Occ	RBP1	0.004988
ATM	DownRegCo-Occ	SLC22A5	0.000544
ATM	DownRegCo-Occ	TRIM68	0.000544
ATM	DownRegCo-Occ	HEBP1	0.002539
ATM	DownRegCo-Occ	RBKS	0.000272
ATM	DownRegCo-Occ	PH-4	0.00136
ATM	DownRegCo-Occ	KIAA0495	0.004081
ATM	DownRegCo-Occ	PHF11	0.001905
ATM	DownRegCo-Occ	EFEMP2	0.004081
ATM	DownRegCo-Occ	PPCS	0.001905
ATM	DownRegCo-Occ	GJA1	0.001905
ATM	DownRegCo-Occ	SSH3	0.004081
ATM	DownRegCo-Occ	SLC25A24	0.003265
ATM	DownRegCo-Occ	RAB11FIP5	0.000907
ATM	DownRegCo-Occ	MSN	0.005986
ATM	DownRegCo-Occ	TNFRSF1A	0.003265
ATM	DownRegCo-Occ	PGCP	0.003265
ATM	DownRegCo-Occ	DHX58	0.000544
ATM	DownRegCo-Occ	FLJ11286	0.002539
ATM	DownRegCo-Occ	NUCB2	0.000544
ATM	DownRegCo-Occ	DYNLT3	0.005986
ATM	DownRegCo-Occ	PSMB10	0.002539
ATM	DownRegCo-Occ	BDH1	0.000907
ATM	DownRegCo-Occ	C3ORF14	0.004988
ATM	DownRegCo-Occ	SSPN	0.00136
ATM	DownRegCo-Occ	MOSC2	0.003265
ATM	DownRegCo-Occ	BHLHB3	0.002539
ATM	DownRegCo-Occ	ECHDC2	0.001905
ATM	DownRegCo-Occ	TMBIM1	0.003265
ATM	DownRegCo-Occ	DOK1	0.000907
ATM	DownRegCo-Occ	MT1E	0.003265
ATM	DownRegCo-Occ	KIAA0323	0.003265
ATM	DownRegCo-Occ	IL13RA1	0.001905
ATM	DownRegCo-Occ	MAF	0.001905
ATM	DownRegCo-Occ	FAH	0.000907
ATM	DownRegCo-Occ	TRIM22	0.002539
ATM	DownRegCo-Occ	LGALS8	0.001905
ATM	DownRegCo-Occ	HDHD3	0.002539
ATM	DownRegCo-Occ	RAB36	0.001905
ATM	DownRegCo-Occ	F11R	0.000544
ATM	DownRegCo-Occ	CASP10	0.001905
ATM	DownRegCo-Occ	SERGEF	0.000544
ATM	DownRegCo-Occ	BLVRB	0.000907
ATM	DownRegCo-Occ	PSEN2	0.002539
ATM	DownRegCo-Occ	CYB561	0.000907
ATM	DownRegCo-Occ	RGN	0.002539
ATM	DownRegCo-Occ	FBXO17	0.004988
ATM	DownRegCo-Occ	IDS	0.000544
ATM	DownRegCo-Occ	STOM	0.002539
ATM	DownRegCo-Occ	NR3C2	0.000272
ATM	DownRegCo-Occ	DGKG	9.1e-05
ATM	DownRegCo-Occ	C13ORF18	0.001905
ATM	DownRegCo-Occ	XKR8	0.002539
ATM	DownRegCo-Occ	ICAM3	0.000544
ATM	DownRegCo-Occ	PNPLA4	0.001905
ATM	DownRegCo-Occ	ST5	0.003265
ATM	DownRegCo-Occ	KCTD12	0.001905
ATM	DownRegCo-Occ	MPP1	0.000272
ATM	DownRegCo-Occ	PAOX	0.00136
ATM	DownRegCo-Occ	APOBEC3G	0.00136
ATM	DownRegCo-Occ	YIPF1	0.003265
ATM	DownRegCo-Occ	ACOX2	0.000907
ATM	DownRegCo-Occ	EMP3	0.005986
ATM	DownRegCo-Occ	LBA1	0.000907
ATM	DownRegCo-Occ	PYCARD	0.000907
ATM	DownRegCo-Occ	MGST2	0.001905
ATM	DownRegCo-Occ	FUCA1	0.000272
ATM	DownRegCo-Occ	PHLDA3	0.000907
ATM	DownRegCo-Occ	PRMT2	0.00136
ATM	DownRegCo-Occ	FAM50B	0.00136

## Sheet: CHL1
CHL1	DownRegCo-Occ	MLH3	0.000907
CHL1	DownRegCo-Occ	SLC25A38	9.1e-05

## Sheet: ConsReg523
ConsReg523	UpRegCo-Occ	CDK4	4e-06
ConsReg523	UpRegCo-Occ	TSPAN31	9.8e-05
ConsReg523	UpRegCo-Occ	TSFM	6.6e-05
ConsReg523	UpRegCo-Occ	FAM119B	0.00052
ConsReg523	UpRegCo-Occ	HOXA2	5.9e-05
ConsReg523	UpRegCo-Occ	CYP27B1	0.000337
ConsReg523	UpRegCo-Occ	MDM2	0.000767
ConsReg523	UpRegCo-Occ	METTL1	0.001089
ConsReg523	UpRegCo-Occ	GRB14	0.001217
ConsReg523	UpRegCo-Occ	ZNF473	0.005584

## Sheet: DST
DST	UpRegCo-Occ	UBE1L2	0.007064
DST	UpRegCo-Occ	THRAP3	1e-06
DST	UpRegCo-Occ	SF3B1	0.007064
DST	UpRegCo-Occ	GTF3C3	2.7e-05
DST	UpRegCo-Occ	REST	0.001553
DST	UpRegCo-Occ	RIF1	0.000344
DST	UpRegCo-Occ	SFRS16	0.003704
DST	UpRegCo-Occ	WRN	0.002519
DST	UpRegCo-Occ	LOC90379	0.007064
DST	UpRegCo-Occ	TOMM40	0.000344
DST	UpRegCo-Occ	ZNF432	0.007064
DST	UpRegCo-Occ	SSR1	0.000407
DST	UpRegCo-Occ	EIF2C4	0.003704
DST	UpRegCo-Occ	NRF1	0.007064

## Sheet: EP300
EP300	UpRegCo-Occ	TFDP2	0.001905
EP300	UpRegCo-Occ	CDH7	0.00136
EP300	DownRegCo-Occ	CBR1	0.002539
EP300	DownRegCo-Occ	ACADS	0.002539
EP300	DownRegCo-Occ	HEBP1	0.002539
EP300	DownRegCo-Occ	SLC25A20	0.004081
EP300	DownRegCo-Occ	PRPS2	0.001905
EP300	DownRegCo-Occ	SSH3	0.004081

## Sheet: EP400
EP400	UpRegCo-Occ	GTPBP4	6.5e-05
EP400	UpRegCo-Occ	C10ORF68	0.000305
EP400	UpRegCo-Occ	ZNF22	6.5e-05
EP400	UpRegCo-Occ	ZNF239	0.000104
EP400	UpRegCo-Occ	SFRS6	0.001618
EP400	UpRegCo-Occ	SEPHS1	0.002684

## Sheet: EPHB4
EPHB4	UpRegCo-Occ	TFDP2	6.5e-05
EPHB4	UpRegCo-Occ	RANBP17	0.000155
EPHB4	UpRegCo-Occ	SUSD5	0.000407
EPHB4	UpRegCo-Occ	MTMR2	7e-06
EPHB4	UpRegCo-Occ	PRR3	3.7e-05
EPHB4	UpRegCo-Occ	ZNF492	0.005584
EPHB4	UpRegCo-Occ	CDH7	0.004007
EPHB4	UpRegCo-Occ	C6ORF124	0.002684
EPHB4	UpRegCo-Occ	GTPBP4	6.5e-05
EPHB4	UpRegCo-Occ	GAS1	6.5e-05
EPHB4	UpRegCo-Occ	TCERG1	0.002684
EPHB4	UpRegCo-Occ	BRD9	3.7e-05
EPHB4	UpRegCo-Occ	C10ORF137	0.000104
EPHB4	UpRegCo-Occ	JMJD1C	6.5e-05
EPHB4	UpRegCo-Occ	PDCD11	3.7e-05
EPHB4	UpRegCo-Occ	TEX10	6.5e-05
EPHB4	UpRegCo-Occ	TPP2	3.7e-05
EPHB4	UpRegCo-Occ	GTF3C2	0.005584
EPHB4	UpRegCo-Occ	TAF5L	1.9e-05
EPHB4	UpRegCo-Occ	PLK4	0.000155
EPHB4	UpRegCo-Occ	DPYSL4	0.004007
EPHB4	UpRegCo-Occ	MCM10	0.005584
EPHB4	UpRegCo-Occ	ALDH18A1	0.000813
EPHB4	UpRegCo-Occ	GNPAT	7e-06
EPHB4	UpRegCo-Occ	TPTE	0.001618
EPHB4	UpRegCo-Occ	SETDB1	0.000104
EPHB4	UpRegCo-Occ	LRP5	1.9e-05
EPHB4	UpRegCo-Occ	TAF5	0.000104
EPHB4	UpRegCo-Occ	EXOSC2	0.004007
EPHB4	UpRegCo-Occ	BMS1	0.004007
EPHB4	UpRegCo-Occ	CCT5	7e-06
EPHB4	UpRegCo-Occ	DET1	6.5e-05
EPHB4	UpRegCo-Occ	SFRS6	0.001618
EPHB4	UpRegCo-Occ	NCAPH	0.000104
EPHB4	UpRegCo-Occ	ARHGEF7	0.005584
EPHB4	UpRegCo-Occ	TIAL1	0.002684
EPHB4	UpRegCo-Occ	KIFC1	6.5e-05
EPHB4	UpRegCo-Occ	PROX1	0.007411
EPHB4	UpRegCo-Occ	UCK2	0.002684
EPHB4	UpRegCo-Occ	IKBKAP	1.9e-05
EPHB4	UpRegCo-Occ	POLQ	0.005584
EPHB4	UpRegCo-Occ	SKIV2L2	0.005584
EPHB4	UpRegCo-Occ	SMARCD1	0.005584
EPHB4	UpRegCo-Occ	SNRPF	0.002684
EPHB4	UpRegCo-Occ	SUV39H2	0.004007
EPHB4	DownRegCo-Occ	SLC25A20	0.000222
EPHB4	DownRegCo-Occ	ACADS	0.000104
EPHB4	DownRegCo-Occ	PPCS	6.5e-05
EPHB4	DownRegCo-Occ	HEBP1	0.000104
EPHB4	DownRegCo-Occ	PHKA2	3.7e-05
EPHB4	DownRegCo-Occ	PHF11	6.5e-05
EPHB4	DownRegCo-Occ	RBP1	0.000305
EPHB4	DownRegCo-Occ	SLC22A5	7e-06
EPHB4	DownRegCo-Occ	SSH3	0.000222
EPHB4	DownRegCo-Occ	GJA1	6.5e-05
EPHB4	DownRegCo-Occ	KIAA0495	0.000222
EPHB4	DownRegCo-Occ	EFEMP2	0.000222
EPHB4	DownRegCo-Occ	MT1E	0.000155
EPHB4	DownRegCo-Occ	DYNLT3	0.000407
EPHB4	DownRegCo-Occ	DOK1	1.9e-05
EPHB4	DownRegCo-Occ	RAB11FIP5	1.9e-05
EPHB4	DownRegCo-Occ	MSN	0.000407
EPHB4	DownRegCo-Occ	C3ORF14	0.000305
EPHB4	DownRegCo-Occ	CYB561	1.9e-05
EPHB4	DownRegCo-Occ	IL13RA1	6.5e-05
EPHB4	DownRegCo-Occ	PRPS2	0.005584
EPHB4	DownRegCo-Occ	ECHDC2	6.5e-05
EPHB4	DownRegCo-Occ	TMBIM1	0.000155
EPHB4	DownRegCo-Occ	PICK1	0.005584
EPHB4	DownRegCo-Occ	SSPN	3.7e-05
EPHB4	DownRegCo-Occ	PSMB10	0.000104
EPHB4	DownRegCo-Occ	HDHD3	0.000104
EPHB4	DownRegCo-Occ	KIAA0323	0.000155
EPHB4	DownRegCo-Occ	MOSC2	0.000155
EPHB4	DownRegCo-Occ	BDH1	1.9e-05
EPHB4	DownRegCo-Occ	PGCP	0.000155
EPHB4	DownRegCo-Occ	LGALS8	6.5e-05
EPHB4	DownRegCo-Occ	CBR1	0.007411
EPHB4	DownRegCo-Occ	BHLHB3	0.000104
EPHB4	DownRegCo-Occ	BLVRB	1.9e-05
EPHB4	DownRegCo-Occ	SLC25A24	0.000155
EPHB4	DownRegCo-Occ	RAB36	6.5e-05
EPHB4	DownRegCo-Occ	TRIM68	0.001618
EPHB4	DownRegCo-Occ	FBXO17	0.000305
EPHB4	DownRegCo-Occ	FAH	1.9e-05
EPHB4	DownRegCo-Occ	ICAM3	7e-06
EPHB4	DownRegCo-Occ	RGN	0.000104
EPHB4	DownRegCo-Occ	EPHX2	0.004007
EPHB4	DownRegCo-Occ	OPLAH	0.001618
EPHB4	DownRegCo-Occ	FLJ11286	0.007411
EPHB4	DownRegCo-Occ	C13ORF18	6.5e-05
EPHB4	DownRegCo-Occ	RARRES2	0.000813
EPHB4	DownRegCo-Occ	YIPF1	0.000155
EPHB4	DownRegCo-Occ	SWAP70	0.009484
EPHB4	DownRegCo-Occ	MGST2	6.5e-05
EPHB4	DownRegCo-Occ	XKR8	0.000104
EPHB4	DownRegCo-Occ	FES	0.000813
EPHB4	DownRegCo-Occ	STOM	0.000104
EPHB4	DownRegCo-Occ	APOBEC3G	3.7e-05
EPHB4	DownRegCo-Occ	CASP10	6.5e-05
EPHB4	DownRegCo-Occ	PNPLA4	6.5e-05
EPHB4	DownRegCo-Occ	EMP3	0.000407
EPHB4	DownRegCo-Occ	RAB32	0.002684
EPHB4	DownRegCo-Occ	PRKCD	1.9e-05
EPHB4	DownRegCo-Occ	PAOX	3.7e-05
EPHB4	DownRegCo-Occ	ACSL5	0.000272
EPHB4	DownRegCo-Occ	EML2	0.000813
EPHB4	DownRegCo-Occ	PYCARD	1.9e-05
EPHB4	DownRegCo-Occ	KLHL26	0.001618
EPHB4	DownRegCo-Occ	FAM50B	3.7e-05
EPHB4	DownRegCo-Occ	SLC24A6	0.005584
EPHB4	DownRegCo-Occ	PPP1R3D	0.002684
EPHB4	DownRegCo-Occ	F11R	0.001618
EPHB4	DownRegCo-Occ	RRAS2	0.001618
EPHB4	DownRegCo-Occ	RBKS	0.000813
EPHB4	DownRegCo-Occ	TMEM47	0.005584
EPHB4	DownRegCo-Occ	PSEN2	0.000104
EPHB4	DownRegCo-Occ	RAB3D	6.5e-05
EPHB4	DownRegCo-Occ	HSPB1	0.005584
EPHB4	DownRegCo-Occ	APOBEC3F	0.000813
EPHB4	DownRegCo-Occ	PARP12	0.001618
EPHB4	DownRegCo-Occ	C20ORF23	0.002684
EPHB4	DownRegCo-Occ	DHRS3	0.004007
EPHB4	DownRegCo-Occ	HPS1	3.7e-05
EPHB4	DownRegCo-Occ	C1S	0.005584
EPHB4	DownRegCo-Occ	FUCA1	0.000813
EPHB4	DownRegCo-Occ	RAB33B	0.005584
EPHB4	DownRegCo-Occ	VAMP5	0.005584
EPHB4	DownRegCo-Occ	FAM129A	0.004007
EPHB4	DownRegCo-Occ	H2AFJ	0.000813
EPHB4	DownRegCo-Occ	NQO2	0.005584
EPHB4	DownRegCo-Occ	LEPREL1	0.000813
EPHB4	DownRegCo-Occ	SLC7A11	0.000272
EPHB4	DownRegCo-Occ	C4ORF18	0.004007
EPHB4	DownRegCo-Occ	TMEM22	0.007411
EPHB4	DownRegCo-Occ	PIK3CD	0.000813
EPHB4	DownRegCo-Occ	TTC12	0.001618
EPHB4	DownRegCo-Occ	IFITM2	0.005584
EPHB4	DownRegCo-Occ	HFE	0.000813
EPHB4	DownRegCo-Occ	SDC4	0.007411
EPHB4	DownRegCo-Occ	FLJ21963	0.002684
EPHB4	DownRegCo-Occ	RGS10	0.001618
EPHB4	DownRegCo-Occ	DEF6	0.000813
EPHB4	DownRegCo-Occ	CADPS2	0.000272
EPHB4	DownRegCo-Occ	UNC93B1	0.001618
EPHB4	DownRegCo-Occ	TRIP6	0.007411
EPHB4	DownRegCo-Occ	MKNK1	0.004007
EPHB4	DownRegCo-Occ	LY75	7e-06
EPHB4	DownRegCo-Occ	COBL	0.004007

## Sheet: FBXW7
FBXW7	UpRegCo-Occ	C6ORF124	0.000907
FBXW7	UpRegCo-Occ	TPTE	0.000544
FBXW7	UpRegCo-Occ	LIMD1	9.1e-05
FBXW7	UpRegCo-Occ	SUSD5	0.005986
FBXW7	UpRegCo-Occ	TCERG1	0.000907
FBXW7	UpRegCo-Occ	RANBP17	0.003265
FBXW7	UpRegCo-Occ	TFDP2	0.001905
FBXW7	UpRegCo-Occ	AMH	0.003265
FBXW7	UpRegCo-Occ	PRR3	0.00136
FBXW7	UpRegCo-Occ	MSH5	0.00136
FBXW7	UpRegCo-Occ	GTF3C2	0.001905
FBXW7	UpRegCo-Occ	POLQ	0.001905
FBXW7	UpRegCo-Occ	PCDHGA3	0.00136
FBXW7	UpRegCo-Occ	NEUROD1	0.001905
FBXW7	UpRegCo-Occ	MTMR2	0.000544
FBXW7	UpRegCo-Occ	USP19	0.000272
FBXW7	UpRegCo-Occ	SMARCD1	0.001905
FBXW7	UpRegCo-Occ	CEP152	0.003265
FBXW7	UpRegCo-Occ	BMS1	0.00136
FBXW7	UpRegCo-Occ	QRICH1	0.000544
FBXW7	UpRegCo-Occ	RNF123	0.000272
FBXW7	UpRegCo-Occ	GAS1	0.001905
FBXW7	UpRegCo-Occ	BOP1	0.00136
FBXW7	UpRegCo-Occ	DDX46	0.00136
FBXW7	UpRegCo-Occ	TTC13	0.00136
FBXW7	UpRegCo-Occ	GNPAT	0.000544
FBXW7	UpRegCo-Occ	PROX1	0.002539
FBXW7	UpRegCo-Occ	BRD9	0.00136
FBXW7	UpRegCo-Occ	DHX30	9.1e-05
FBXW7	UpRegCo-Occ	EYA1	0.001905
FBXW7	UpRegCo-Occ	POLR3E	0.00136
FBXW7	UpRegCo-Occ	SKIV2L2	0.001905
FBXW7	UpRegCo-Occ	RPL23	0.00136
FBXW7	UpRegCo-Occ	JMJD1C	0.001905
FBXW7	UpRegCo-Occ	SMARCC1	0.001905
FBXW7	UpRegCo-Occ	KIF14	0.002539
FBXW7	UpRegCo-Occ	SETDB1	0.002539
FBXW7	UpRegCo-Occ	GTPBP4	0.001905
FBXW7	UpRegCo-Occ	MYBL1	0.003265
FBXW7	UpRegCo-Occ	MDC1	0.000544
FBXW7	UpRegCo-Occ	TAF5L	0.000907
FBXW7	UpRegCo-Occ	VARS	0.000544
FBXW7	UpRegCo-Occ	TSEN2	0.000544
FBXW7	UpRegCo-Occ	PHF16	0.001905
FBXW7	UpRegCo-Occ	NUP188	0.000544
FBXW7	UpRegCo-Occ	PDCD11	0.00136
FBXW7	UpRegCo-Occ	LARS	0.000272
FBXW7	UpRegCo-Occ	ZNF318	0.000272
FBXW7	UpRegCo-Occ	TUBGCP4	0.001905
FBXW7	UpRegCo-Occ	ZNF167	0.00136
FBXW7	UpRegCo-Occ	C10ORF137	0.002539
FBXW7	UpRegCo-Occ	TRAF4	0.002539
FBXW7	UpRegCo-Occ	NEUROD4	0.00136
FBXW7	UpRegCo-Occ	HNRPH3	0.000907
FBXW7	UpRegCo-Occ	CEP63	0.000907
FBXW7	UpRegCo-Occ	SFRS6	0.000544
FBXW7	UpRegCo-Occ	CNOT6	0.002539
FBXW7	UpRegCo-Occ	CDK10	0.00136
FBXW7	UpRegCo-Occ	PBRM1	0.000907
FBXW7	UpRegCo-Occ	FXYD7	0.003265
FBXW7	UpRegCo-Occ	PARG	0.003265
FBXW7	UpRegCo-Occ	HNRPA3	0.000544
FBXW7	UpRegCo-Occ	SR140	0.000907
FBXW7	UpRegCo-Occ	PLK4	0.003265
FBXW7	UpRegCo-Occ	SFRS1	0.00136
FBXW7	UpRegCo-Occ	STX6	0.00136
FBXW7	UpRegCo-Occ	EEF1D	0.000272
FBXW7	UpRegCo-Occ	JARID1B	0.000907
FBXW7	UpRegCo-Occ	MLLT4	0.000272
FBXW7	UpRegCo-Occ	ARID4B	0.000544
FBXW7	UpRegCo-Occ	DUSP10	0.000907
FBXW7	UpRegCo-Occ	NCAPD3	0.004988
FBXW7	UpRegCo-Occ	TEX10	0.001905
FBXW7	UpRegCo-Occ	TAF5	0.002539
FBXW7	UpRegCo-Occ	CDK5RAP2	0.000272
FBXW7	UpRegCo-Occ	BRD1	0.000544
FBXW7	UpRegCo-Occ	AKAP7	0.000907
FBXW7	UpRegCo-Occ	NCAPH	0.002539
FBXW7	UpRegCo-Occ	SECISBP2	0.00136
FBXW7	UpRegCo-Occ	INTS7	0.00136
FBXW7	UpRegCo-Occ	TPP2	0.00136
FBXW7	UpRegCo-Occ	THUMPD2	0.000907
FBXW7	UpRegCo-Occ	GNL3	0.000907
FBXW7	UpRegCo-Occ	CCDC99	0.000907
FBXW7	UpRegCo-Occ	ZNF239	0.002539
FBXW7	UpRegCo-Occ	IKBKAP	0.000907
FBXW7	UpRegCo-Occ	ZNF695	0.001905
FBXW7	UpRegCo-Occ	C10ORF18	0.003265
FBXW7	UpRegCo-Occ	RBM15B	0.000272
FBXW7	UpRegCo-Occ	LRP5	0.000907
FBXW7	UpRegCo-Occ	WRNIP1	0.00136
FBXW7	UpRegCo-Occ	EHMT2	0.000544
FBXW7	UpRegCo-Occ	KIFC1	0.001905
FBXW7	UpRegCo-Occ	CCT5	0.000544
FBXW7	UpRegCo-Occ	DET1	0.001905
FBXW7	UpRegCo-Occ	PRDM10	0.001905
FBXW7	UpRegCo-Occ	ATXN2L	0.000272
FBXW7	UpRegCo-Occ	NR2C1	0.000907
FBXW7	UpRegCo-Occ	AGPAT4	0.000544
FBXW7	UpRegCo-Occ	SCML2	0.00136
FBXW7	UpRegCo-Occ	ZNF37A	0.004988
FBXW7	UpRegCo-Occ	UBR5	0.000907
FBXW7	UpRegCo-Occ	NUCKS1	0.000544
FBXW7	UpRegCo-Occ	LBR	0.000272
FBXW7	UpRegCo-Occ	EDG4	0.001905
FBXW7	UpRegCo-Occ	MKI67	0.00136
FBXW7	UpRegCo-Occ	ZC3H7A	0.000907
FBXW7	UpRegCo-Occ	PRPF4B	0.000544
FBXW7	UpRegCo-Occ	ERCC3	0.00136
FBXW7	UpRegCo-Occ	UBFD1	0.000544
FBXW7	UpRegCo-Occ	MGEA5	0.002539
FBXW7	UpRegCo-Occ	ZNF589	0.000907
FBXW7	UpRegCo-Occ	RAF1	0.000907
FBXW7	UpRegCo-Occ	PFAS	0.000907
FBXW7	UpRegCo-Occ	GNE	0.000907
FBXW7	UpRegCo-Occ	GTF3C3	0.001905
FBXW7	UpRegCo-Occ	KIAA0133	0.000544
FBXW7	UpRegCo-Occ	POLA2	0.00136
FBXW7	UpRegCo-Occ	ARHGEF11	0.000907
FBXW7	UpRegCo-Occ	DBN1	0.00136
FBXW7	UpRegCo-Occ	GFRA1	0.000907
FBXW7	UpRegCo-Occ	C1ORF107	0.000907
FBXW7	UpRegCo-Occ	EXOD1	0.00136
FBXW7	UpRegCo-Occ	ANAPC1	0.000272
FBXW7	UpRegCo-Occ	TOPBP1	0.001905
FBXW7	UpRegCo-Occ	DHX8	0.000907
FBXW7	UpRegCo-Occ	GSK3B	0.000907
FBXW7	UpRegCo-Occ	MPHOSPH1	0.002539
FBXW7	UpRegCo-Occ	SFRS2	0.000907
FBXW7	UpRegCo-Occ	POLE	0.004988
FBXW7	UpRegCo-Occ	EDC3	0.000544
FBXW7	UpRegCo-Occ	NUP153	0.000544
FBXW7	UpRegCo-Occ	KIAA0947	0.000272
FBXW7	UpRegCo-Occ	FLJ10213	0.000544
FBXW7	UpRegCo-Occ	RAD54L2	9.1e-05
FBXW7	UpRegCo-Occ	ZNF384	0.000544
FBXW7	UpRegCo-Occ	MTA2	0.00136
FBXW7	UpRegCo-Occ	CNNM3	0.001905
FBXW7	UpRegCo-Occ	C4ORF15	0.00136
FBXW7	UpRegCo-Occ	LRCH1	0.002539
FBXW7	UpRegCo-Occ	DNAJC7	0.000544
FBXW7	UpRegCo-Occ	DNAJC13	9.1e-05
FBXW7	DownRegCo-Occ	PPCS	0.001905
FBXW7	DownRegCo-Occ	SLC25A20	0.004081
FBXW7	DownRegCo-Occ	ACADS	0.002539
FBXW7	DownRegCo-Occ	PHF11	0.001905
FBXW7	DownRegCo-Occ	MEST	0.001905
FBXW7	DownRegCo-Occ	PICK1	0.001905
FBXW7	DownRegCo-Occ	HEBP1	0.002539
FBXW7	DownRegCo-Occ	TRIP6	0.002539
FBXW7	DownRegCo-Occ	RBP1	0.004988
FBXW7	DownRegCo-Occ	NINJ1	0.000544
FBXW7	DownRegCo-Occ	GALC	0.000907
FBXW7	DownRegCo-Occ	DOK1	0.000907
FBXW7	DownRegCo-Occ	SLC24A6	0.001905
FBXW7	DownRegCo-Occ	MT1E	0.003265
FBXW7	DownRegCo-Occ	TMBIM1	0.003265
FBXW7	DownRegCo-Occ	NQO2	0.001905
FBXW7	DownRegCo-Occ	RAB11FIP5	0.000907
FBXW7	DownRegCo-Occ	RAB33B	0.001905
FBXW7	DownRegCo-Occ	SLC22A5	0.000544
FBXW7	DownRegCo-Occ	GJA1	0.001905
FBXW7	DownRegCo-Occ	PHKA2	0.00136
FBXW7	DownRegCo-Occ	KIAA0495	0.004081
FBXW7	DownRegCo-Occ	SSH3	0.004081
FBXW7	DownRegCo-Occ	EML2	0.000272
FBXW7	DownRegCo-Occ	TMEM47	0.001905
FBXW7	DownRegCo-Occ	IFITM3	0.00136
FBXW7	DownRegCo-Occ	PSMB10	0.002539
FBXW7	DownRegCo-Occ	EFEMP2	0.004081
FBXW7	DownRegCo-Occ	MSN	0.005986
FBXW7	DownRegCo-Occ	FLJ20699	0.000544
FBXW7	DownRegCo-Occ	IL13RA1	0.001905
FBXW7	DownRegCo-Occ	CAPNS1	0.000907
FBXW7	DownRegCo-Occ	CYB561	0.000907
FBXW7	DownRegCo-Occ	DYNLT3	0.005986
FBXW7	DownRegCo-Occ	MTHFS	0.000907
FBXW7	DownRegCo-Occ	C3ORF14	0.004988
FBXW7	DownRegCo-Occ	BDH1	0.000907
FBXW7	DownRegCo-Occ	BLVRB	0.000907
FBXW7	DownRegCo-Occ	PGCP	0.003265
FBXW7	DownRegCo-Occ	EPHX2	0.00136
FBXW7	DownRegCo-Occ	RAB32	0.000907
FBXW7	DownRegCo-Occ	ECHDC2	0.001905
FBXW7	DownRegCo-Occ	ADCK2	0.00136
FBXW7	DownRegCo-Occ	FAH	0.000907
FBXW7	DownRegCo-Occ	KHK	0.000544
FBXW7	DownRegCo-Occ	MARCH2	0.000907
FBXW7	DownRegCo-Occ	MOSC2	0.003265
FBXW7	DownRegCo-Occ	ARSD	0.001905
FBXW7	DownRegCo-Occ	DDB2	0.000272
FBXW7	DownRegCo-Occ	HDHD3	0.002539
FBXW7	DownRegCo-Occ	KIAA0323	0.003265
FBXW7	DownRegCo-Occ	YIPF1	0.003265
FBXW7	DownRegCo-Occ	S100A13	0.004988
FBXW7	DownRegCo-Occ	HSPB1	0.001905
FBXW7	DownRegCo-Occ	RAB36	0.001905
FBXW7	DownRegCo-Occ	PPP1R3D	0.000907
FBXW7	DownRegCo-Occ	CD58	0.001905
FBXW7	DownRegCo-Occ	CD302	0.00136
FBXW7	DownRegCo-Occ	PRKCD	0.000907
FBXW7	DownRegCo-Occ	KLHL26	0.000544
FBXW7	DownRegCo-Occ	IFITM2	0.001905
FBXW7	DownRegCo-Occ	UNC93B1	0.000544
FBXW7	DownRegCo-Occ	ETV2	0.000544
FBXW7	DownRegCo-Occ	EMP3	0.005986
FBXW7	DownRegCo-Occ	LGALS8	0.001905
FBXW7	DownRegCo-Occ	RGN	0.002539
FBXW7	DownRegCo-Occ	ICAM3	0.000544
FBXW7	DownRegCo-Occ	C14ORF169	0.00136
FBXW7	DownRegCo-Occ	RARRES3	0.000907
FBXW7	DownRegCo-Occ	FBXO17	0.004988
FBXW7	DownRegCo-Occ	APOBEC3G	0.00136
FBXW7	DownRegCo-Occ	APOBEC3F	0.000272
FBXW7	DownRegCo-Occ	ABHD8	0.000272
FBXW7	DownRegCo-Occ	MGST2	0.001905
FBXW7	DownRegCo-Occ	XKR8	0.002539
FBXW7	DownRegCo-Occ	SSPN	0.00136
FBXW7	DownRegCo-Occ	RGS10	0.000544
FBXW7	DownRegCo-Occ	C13ORF18	0.001905
FBXW7	DownRegCo-Occ	IQCG	0.00136
FBXW7	DownRegCo-Occ	SLC43A3	0.009523
FBXW7	DownRegCo-Occ	SLC25A24	0.003265
FBXW7	DownRegCo-Occ	PAOX	0.00136
FBXW7	DownRegCo-Occ	BHLHB3	0.002539
FBXW7	DownRegCo-Occ	PNPLA4	0.001905
FBXW7	DownRegCo-Occ	HFE	0.000272
FBXW7	DownRegCo-Occ	PYCARD	0.000907
FBXW7	DownRegCo-Occ	RAB3D	0.001905
FBXW7	DownRegCo-Occ	RRAGC	0.000907
FBXW7	DownRegCo-Occ	SLC27A5	9.1e-05
FBXW7	DownRegCo-Occ	HLA-E	0.00136
FBXW7	DownRegCo-Occ	GLRX	0.001905
FBXW7	DownRegCo-Occ	STOM	0.002539
FBXW7	DownRegCo-Occ	PLP2	0.002539
FBXW7	DownRegCo-Occ	CASP10	0.001905
FBXW7	DownRegCo-Occ	COBL	0.00136
FBXW7	DownRegCo-Occ	IRF5	0.000544
FBXW7	DownRegCo-Occ	FAM50B	0.00136
FBXW7	DownRegCo-Occ	EFHD2	0.000907
FBXW7	DownRegCo-Occ	SH2D4A	0.000907
FBXW7	DownRegCo-Occ	PDE6B	0.00136
FBXW7	DownRegCo-Occ	ASL	0.00136
FBXW7	DownRegCo-Occ	HLA-DRB6	0.000272
FBXW7	DownRegCo-Occ	CORO1A	0.000272
FBXW7	DownRegCo-Occ	PRUNE2	0.001905
FBXW7	DownRegCo-Occ	TDRD7	0.000907
FBXW7	DownRegCo-Occ	CHRD	0.000907
FBXW7	DownRegCo-Occ	TPK1	0.000544
FBXW7	DownRegCo-Occ	SQRDL	0.001905
FBXW7	DownRegCo-Occ	MGC2752	0.001905
FBXW7	DownRegCo-Occ	NPC2	0.000907
FBXW7	DownRegCo-Occ	LY75	0.000544
FBXW7	DownRegCo-Occ	HPS1	0.00136
FBXW7	DownRegCo-Occ	PAK1	0.000907
FBXW7	DownRegCo-Occ	PSEN2	0.002539
FBXW7	DownRegCo-Occ	ADRA1A	0.000272
FBXW7	DownRegCo-Occ	IRF7	0.001905
FBXW7	DownRegCo-Occ	SLC37A4	0.000272

[truncated: 31 more sheets: FGFR1, FGFR4, FN1, FURIN, HPN, IDH1, INHBC, KCNG1, KLF6, LEMD3, LGALS3BP, LUM, MADD, MAPK9, MARK1, MET, MKI67, MSH6, MYST4, NF1 …]
