# Supplementary material for: Correlation of Somatic Mutation and Expression Identifies Genes Important in Human Glioblastoma Progression and Survival
Source: Oxford University Press journal article supplement (doi:10.1158/0008-5472.can-11-0180), 2011-05-10
Supplement: 00085472can110180-sup-sdata_4.xls [file 00085472can110180-sup-sdata_4.xls]

## Sheet: Sheet1
ABCA1	Co-Occ	BCAS1	0.00743724	Mutation
ABCA1	Co-Occ	MST1R	0.00743724	Mutation
ABCA1	Co-Occ	ConsReg1707	0.000446984	Mutation
ABCA1	Co-Occ	ConsReg4644	2.52593627418e-05	Mutation
ANK1	Co-Occ	SYNE1	0.00022211	Mutation
ARHGAP9	Co-Occ	SLC26A10	0.000155477	Mutation
ARHGAP9	Co-Occ	T	0.00035562	Mutation
BCAS1	Co-Occ	DSG2	0.00509136	Mutation
BCAS1	Co-Occ	DSG1	0.00326727	Mutation
BCAS1	Co-Occ	BMP2	0.00191679	Mutation
BCAS1	Co-Occ	ME3	0.000983853	Mutation
BCAS3	Co-Occ	MKI67	0.00541392	Mutation
C10orf54	Co-Occ	RHPN2	0.0015535	Mutation
C10orf54	Co-Occ	MKI67	0.00883539	Mutation
CDH23	Co-Occ	COL1A2	0.00801237	Mutation
CDH23	Co-Occ	SERPINB5	0.002949	Mutation
CDKN2A	Co-Occ	FN1	7.40365074018e-06	Mutation
CDKN2A	Co-Occ	MSH6	2.9462473151e-05	Mutation
CDKN2A	Co-Occ	EP400	7.40365074018e-06	Mutation
CDKN2A	Co-Occ	SYNE1	0.000856491	Mutation
COL4A1	Co-Occ	CYP1B1	0.00903137	Mutation
COL6A2	Co-Occ	BCL11A	0.000181299	Mutation
ConsReg1707	Co-Occ	NRAP	0.000499649	Mutation
ConsReg523	Co-Occ	CPA4	0.00671014	Mutation
CYP27B1	Co-Occ	MKI67	0.00541392	Mutation
DBC1	Co-Occ	C9orf66	0.00374625	Mutation
DMRT1	Co-Occ	NRAP	0.00625811	Mutation
DSG1	Co-Occ	ME3	0.000621417	Mutation
DSG1	Co-Occ	RIPK3	0.00903137	Mutation
DSG2	Co-Occ	MST1R	0.00509136	Mutation
DSG2	Co-Occ	PLSCR3	0.00191679	Mutation
DSP	Co-Occ	ICA1	0.00538372	Mutation
DSP	Co-Occ	TNC	0.00280784	Mutation
DST	Co-Occ	PRKDC	0.0037038	Mutation
DST	Co-Occ	FANCA	0.00272536	Mutation
DST	Co-Occ	MSH6	0.0015535	Mutation
DST	Co-Occ	ConsReg1707	0.00354439	Mutation
DST	Co-Occ	SYNE1	0.00401006	Mutation
EP400	Co-Occ	SYNE1	0.00022211	Mutation
EPHB4	Co-Occ	SYNE1	0.00022211	Mutation
EPHB6	Co-Occ	TNC	7.32758583532e-05	Mutation
FANCA	Co-Occ	ZFP106	0.00741487	Mutation
FANCA	Co-Occ	IQWD1	0.003161	Mutation
FN1	Co-Occ	MSH6	7.40365074018e-06	Mutation
FN1	Co-Occ	EP400	1.85091268504e-06	Mutation
FN1	Co-Occ	SYNE1	0.00022211	Mutation
IDH1	Co-Occ	TEK	0.00280784	Mutation
IDH1	Co-Occ	SYNE1	0.00276779	Mutation
IFT74	Co-Occ	RIPK3	0.00538372	Mutation
INHBC	Co-Occ	MKI67	0.00541392	Mutation
ITPR3	Co-Occ	SYNE1	0.000856491	Mutation
LTF	Co-Occ	IFT74	0.00121709	Mutation
MAPKBP1	Co-Occ	FANCA	0.00636524	Mutation
MAPKBP1	Co-Occ	ZFP106	0.00146025	Mutation
MERTK	Co-Occ	BCAS1	0.00206796	Mutation
MERTK	Co-Occ	LOC54103	3.21948057526e-05	Mutation
MKI67	Co-Occ	NRAP	0.00025238	Mutation
MSH6	Co-Occ	EP400	7.40365074018e-06	Mutation
MSH6	Co-Occ	SYNE1	1.06490866811e-05	Mutation
NF1	Co-Occ	DMBT1	0.00658448	Mutation
NF1	Co-Occ	HPN	0.00563369	Mutation
NOTCH4	Co-Occ	ConsReg1707	0.00327797	Mutation
NTRK1	Co-Occ	MST1R	0.000403955	Mutation
PIK3R1	Co-Occ	PAPPA2	0.00280784	Mutation
PRKDC	Co-Occ	ERBB2	0.00599692	Mutation
PTEN	Co-Occ	RB1	0.000590819	Mutation
PTPRZ1	Co-Occ	SYNE1	0.000856491	Mutation
RET	Co-Occ	MERTK	0.00476325	Mutation
RET	Co-Occ	COL6A3	0.00476325	Mutation
SLC26A10	Co-Occ	T	0.000673732	Mutation
SYNE1	Co-Occ	MLH1	0.00022211	Mutation
T	Co-Occ	CPA4	0.00756203	Mutation
TNFRSF10A	Co-Occ	ITPR3	2.53549682883e-07	Mutation
TNFRSF10A	Co-Occ	SYNE1	5.14828259547e-05	Mutation
TP53	Co-Occ	KIT	0.00986714	Mutation
TP53	Co-Occ	RHPN2	0.00986714	Mutation
TP53	Co-Occ	TMEM16E	0.00468304	Mutation
TP53	Co-Occ	TNC	0.00299417	Mutation
